Urol Int , DOI: 10.1159/000551236

Received: December 3, 2025

Accepted: February 21, 2026

Published online: March 3, 2026

**A systematic review comparing sex-specific outcomes of  
prospective clinical trials and subsequent real-world data  
focusing on systemic treatment options for renal cell cancer**

Roesch MC, Stolzenbach LF, Lütje LS, Praus F, Gilbert N, Merseburger AS,  
Osmonov D

ISSN: 0042-1138 (Print), eISSN: 1423-0399 (Online)

<https://www.karger.com/UIN>

Urologia Internationalis

**Disclaimer:**

Accepted, unedited article not yet assigned to an issue. The statements, opinions and data contained in this publication are solely those of the individual authors and contributors and not of the publisher and the editor(s). The publisher and the editor(s) disclaim responsibility for any injury to persons or property resulting from any ideas, methods, instructions or products referred to the content.

**Copyright:**

© 2026 S. Karger AG, Basel

## Systematic Review

A systematic review comparing sex-specific outcomes of prospective clinical trials and subsequent real-world data focusing on systemic treatment options for renal cell cancer

Marie Christine Roesch <sup>a</sup>, Lara Franziska Stolzenbach <sup>a</sup>, Lea Sophie Lütje <sup>a</sup>, Friederike Praus <sup>a</sup>, Nils Gilbert <sup>a</sup>, Axel Stuart Merseburger <sup>a</sup>, Daniar Osmonov <sup>a</sup>

a: Department of Urology, University Hospital Schleswig-Holstein, Campus Luebeck, Ratzeburger Allee 160, 23538 Luebeck, Germany

PD Dr. med. Marie Christine Roesch, MBA : [mariechristine.roesch@uksh.de](mailto:mariechristine.roesch@uksh.de)

Dr. med. Lara Franziska Stolzenbach: [larafranziska.stolzenbach@uksh.de](mailto:larafranziska.stolzenbach@uksh.de)

Lea Sophie Lütje, M. Sc. : [leasophie.luetje@uksh.de](mailto:leasophie.luetje@uksh.de)

Dr. med. Friederike Praus: [friederike.praus@uksh.de](mailto:friederike.praus@uksh.de)

Dr. med. Nils Gilbert: [nils.gilbert@uksh.de](mailto:nils.gilbert@uksh.de)

Professor Dr. med. Axel Stuart Merseburger: [axel.merseburger@uksh.de](mailto:axel.merseburger@uksh.de)

Professor Dr. med. Daniar Osmonov: [daniar.osmonov@uksh.de](mailto:daniar.osmonov@uksh.de)

Short title: Sex-specific outcome in renal cancer treatments: clinical trials vs. real-world

### Corresponding Author:

Priv. Doz. Dr. med. Marie C. Roesch, MBA

Department of Urology

University Hospital Schleswig-Holstein, Campus Luebeck

Ratzeburger Allee 160 in 23538 Luebeck, Germany

Mail: [mariechristine.roesch@uksh.de](mailto:mariechristine.roesch@uksh.de)

Keywords: clinical trials; differences; real-world data; renal cancer; sex

Word count abstract: 199

Word count full text: 2478

Tables: 10

Figures: 1

## Abstract

### Introduction:

Sex-based differences in enrollment rates in clinical trials and in cancer outcomes are evident. Real-world (RW) results might differ from phase II/III trials. The aim is to compare sex-specific outcomes of RW studies and randomized controlled trials (RCT) in locally advanced or metastasized renal cell cancer (la/mRCC).

### Methods:

A systematic search in EMBASE, PubMed, MEDLINE, and Scopus on systemic therapies for la/mRCC was performed. Phase II/III trials, RCT, non-interventional prospective studies, retrospective studies, or case series were included. Data on OS and PFS (DFS for adjuvant therapies), enrollment rates and adverse events were retrieved.

### Results

70 studies were included. Females were underrepresented in RCTs. Some RW analyses exceeded the epidemiological benchmark. Outcome analyses exclusively revealed advantages for males: better OS/PFS for Cabozantinib (RW), better OS for Nivolumab (CheckMate025), better PFS for Tivozanib (TIVO-3), better PFS for Nivolumab+Ipilimumab (RW), better OS for Nivolumab+Cabozantinib (CheckMate 9ER), better DFS for adjuvant Pembrolizumab (Keynote-564). No sex-specific toxicity analyses were published in RW studies or RCT.

### Conclusion:

This systematic review enlightens sex-specific gaps in enrollment and cancer outcome, as well as the lack of sex-specific toxicity analyses. Balanced enrollment rates and reporting of sex-specific toxicity should be obligate in evaluations of la/mRCC treatments.

## Introduction

Individualized and personalized medicine is the main goal for the future of cancer treatment. There is evidence elucidating sex-specific outcomes for different kinds of cancer treatments. This also pertains to urologic malignancies. Thus, during the treatment selection process the biological sex should also play an increasing role next to established factors such as immunohistochemistry markers, volume of metastases or gene mutations.

A recent meta-analysis by Cerrato et al. including 18 randomized controlled trials for renal cancer and urothelial cancer revealed a survival advantage for female patients for adjuvant Atezolizumab for renal cancer and vice versa a survival advantage for male patients for the treatment of urothelial cancer with Nectin-4 targeted ADC (antibody-drug conjugate) [1]. Next to biochemical factors such as pharmacodynamics and pharmacokinetics also statistical bias might lead to these results. Recent reports suggest an underrepresentation of female patients in clinical trials. Sosinsky et al. analyzed more than 1.400 US-based (United States) Phase I-III trials including cardiovascular, psychiatric and cancer diseases. While 51% of the cancer disease population were female, only 41% of the included cancer trial patients were female [2]. Also, our research group highlighted in a recent narrative review that the sex-specific epidemiology rates of urologic malignancies were not necessarily reflected in the enrollment rates of urologic cancer trials [3].

Thus, the aim of systemic review is to further elucidate the sex-gap between participation rates, cancer outcomes, as well as toxicity rates in clinical trials and real-world epidemiology data with a focus on systemic therapies for locally advanced or metastasized renal cell cancer (la/mRCC).

## Methods

This review was registered at PROSPERO (number: CRD420251018407) under the following link: <https://www.crd.york.ac.uk/PROSPERO/view/CRD420251018407> [4].

The following studies were included: phase II/III trials, randomized-controlled trials, non-interventional prospective studies, retrospective studies, or case series (n>4). All studies except phase II/III trials leading to a drug approval are hereafter referred to as real-world studies. The date of publication had to be between January 2014 and February 2025. The studies had to focus on renal cell cancer treatment and had to be published in English. All other kinds of studies were excluded.

The main databases to be searched were Embase.com, MEDLINE, PubMed and Scopus between August 2024 and February 2025.

Results of individual studies are shown in tables. Each table represents studies dealing with one specific kind of therapy regimen. The top lines of the tables depict the results of the approval studies and the subsequent lines show the results of published real-world data. Each study is cited and its characteristics and results are presented in **Table 1-9**.

**Table 10** presents the search strings used in the mentioned databases.

Studies were screened independently by at least two people with a process to resolve differences (MCR, NG and LFS). Data were extracted by one person (MCR) and checked by at least one other person (LFS).

The following outcome parameters were extracted: HR (CI; hazard ratio, 95% confidence interval) for overall survival (OS), HR for progression-free survival (or disease-free survival for adjuvant therapies; PFS and DFS), sex-specific participation rates in all kinds of studies (%), and sex-specific discontinuation rates due to toxic effects or adverse events.

A risk of bias assessment was not performed, as this systematic review does not compare different treatment options. The different study results were only interpreted and characterized.

This systemic review followed PRISMA guidelines.

## Results

### General

The search and selection processes are depicted in **Figure 1**. The initial search spanned studies dealing with urothelial cancer and renal cancer (as systemic review articles for both entities are planned). In the beginning, there were 180 studies identified for screening. 171 records entered the step of assessing the full text articles for eligibility. In total, 122 studies were included for systemic

review and among those 70 studies are dealing with renal cancer. The following therapy regimens were included in this review: Cabozantinib, Nivolumab, Lenvatinib + Everolimus, Tivozanib, Pembrolizumab + Axitinib, Nivolumab + Ipilimumab, Nivolumab + Cabozantinib, Pembrolizumab + Lenvatinib, and Pembrolizumab adjuvant. Pembrolizumab as an adjuvant therapy for patients with an increased risk of recurrence after renal surgery (+/- resection of metastatic lesions) was the latest EMA-approved (European Medicines Agency) therapy included in this study (January 2022; [5])

### **Cabozantinib**

The approval studies of Cabozantinib monotherapy for first line or subsequent line therapy (CABOSUN [6] and METEOR [7]) included 21.7% and 24.8% female patients, respectively (**Table 1**). There were no sex-specific study results published. There are 22 real-world studies. The inclusion rates of female patients in the real-world studies ranged from 20.1% to 45.5%. The average rate of included female patients in the real-world studies was 26.7%, i.e. higher than the inclusion rates of the approval studies. Only Tomida et al., Sazuka et al., Ishihara et al. and Santoni et al. published sex-specific outcomes [13,16,17,21]. Only the analyses by Santoni et al. revealed statistically significant outcomes: OS and PFS was worse in females compared to males for Cabozantinib as a subsequent line therapy [21] [34338966]. Notably, Santoni et al. included in their multicenter retrospective study 45.5% female patients [21]. There were no sex-specific toxicity analyses published either in the two clinical trials nor in the 22 real-world data.

### **Nivolumab**

In the approval study Checkmate025 for Nivolumab monotherapy 24.6% of the patients were female. Whereas male patients benefitted from Nivolumab regarding OS, female patients did not benefit from Nivolumab (vs. Everolimus). There were no sex-specific toxicity analyses published [30] (**Table 2**). Only two out of the 15 real-world studies—those by Di Giorgi et al. and Vrdoljak et al.—conducted sex-specific cancer outcome analyses; however, neither reported statistically significant results [31,41]. The inclusion rate of female patients in the real-world studies was 24.4 % on average, with a range between 16.7% and 35.0%. Notably, one out of these 15 real-world studies is also listed in **Table 1**.

### **Lenvatinib + Everolimus**

The phase II E7080-G000-205 trial compared Lenvatinib monotherapy vs. Everolimus monotherapy vs. Lenvatinib + Everolimus combination therapy. 26.8% of the included patients were female. There were no sex-specific outcome or toxicity analyses published [45] (**Table 3**). Our study selection process revealed two real-world studies. The study by Hamieh et al. included zero female patients while there were 29.1% female patients in the study by Wiele et al. [46,47]. Also, in these two real-world studies there were no sex-specific outcome or toxicity analyses.

### **Tivozanib**

TIVO-1 and TIVO-3 were the approval studies for Tivozanib in mRCC [48,49] (**Table 4**) with 27.7% and 27.4% female patients, respectively. We identified two succeeding real-world studies with an average inclusion rate of female patients of 30.4% [50,51]. Only TIVO-3 performed a sex-specific analysis revealing a better PFS outcome for male patients than for female patients when taking Tivozanib (vs. Sorafenib) [49].

### **Pembrolizumab + Axitinib**

The approval of Pembrolizumab + Axitinib as first line therapy in mRCC was based on the Keynote-426 trial [52] (**Table 5**). In this trial, 27.1% of the patients were female. Sex-specific toxicity analyses revealed no differences in cancer outcomes. Toxicity analyses were not shown. In the eight listed real-world studies sex-specific analyses were only performed by Guida et al. in the ProPAXI study, however showing no statistically relevant results [60]. The average inclusion rate of female patients was 26.6% and ranged between 19.1% and 32.7% in the real-world data. Sex-specific toxicity analyses were not available in neither of the studies.

### **Nivolumab + Ipilimumab**

The combination therapy Nivolumab + Ipilimumab was approved due to the Checkmate-214 trial [61] (**Table 6**) and is effective in both male and female patients as demonstrated in the sex-specific OS-analysis. 27.4% of the included patients were female in this trial. There are 12 studies examining real-world results of this combination. The mean inclusion rate of female patients among these 12 studies was 24.0% (range 15.3-30.0%). In the sex-specific PFS analysis by Kato et al. the outcome of female patients was significantly worse than for male patients [63]. There are two more real-world studies with sex-specific outcome analyses, however their results were not statistically significant. There were no sex-specific toxicity analyses shown. Notably, four out of these 12 real-world studies are also listed in **Table 5**.

### **Nivolumab + Cabozantinib**

The CheckMate 9ER served as the basis for the approval of Nivolumab + Cabozantinib as first line therapy for mRCC [70] (**Table 7**). The inclusion rate of female patients numbered 26.1%. While there was an OS advantage for males receiving Nivolumab + Cabozantinib (vs. Sunitinib), there was no survival advantage for females [70]. Hilser et al. included in their retrospective real-world study 33.3% females. They did not perform sex-specific outcome or toxicity analyses.

### **Pembrolizumab + Lenvatinib**

In consequence of the CLEAR trial, including 25.5% female patients, the combination of Pembrolizumab + Lenvatinib was approved as first line therapy for mRCC [72] (**Table 8**). Sex-specific PFS analysis revealed similar results for male and female patients. In a subsequent real-world analysis by Hara et al. the proportion of female patients was 18.0%. No sex-specific outcome or toxicity analyses were performed.

### **Pembrolizumab adjuvant**

The Keynote-564 trial led to the approval of Pembrolizumab as an adjuvant therapy for patients with an increased risk of recurrence after renal cancer surgery [74] (**Table 9**). 29.0% of the patients were female. Male patients benefitted in this trial from the adjuvant therapy with Pembrolizumab (vs. placebo) in terms of DFS, whereas there was no benefit for the female subgroup. Mattigk et al. performed a retrospective study, which included female patients at a rate of 35.3% [75]. No sex-specific outcome or toxicity analyses were performed in this study.

### **Discussion**

In an epidemiological analysis by Rosiello et al. 34.1% of all mRCC patients in the US were female [76]. Thus, approximately every third patient in prospective clinical trials exploring new systemic therapies for mRCC should be female. None of the mRCC clinical trials included in this systematic review enrolled this proportion of female patients (**Table 1-9**). Notably, among the real-world studies the benchmark of one third was reached and even outperformed by some studies, which vice versa lead to an underrepresentation of male patients in those studies. However, the majority of the averaged enrollment rates of female patients was below one third. As described introductorily, this sex-gap in the enrollment rates for cancer trials was also depicted by Sosinsky et al. [2].

Our review also elucidates a sex-gap in cancer outcome for mRCC patients. In total, we included 11 prospective approval trials in this systematic review. Only seven of these prospective trials performed and published sex-specific outcome analyses. There are some real-world analyses with sex-specific outcome analyses. These are the statistically significant cancer outcomes differences in either approval trials or real-world studies in summary:

- For Cabozantinib monotherapy the real-world analysis by Santoni et al. revealed a better OS and PFS for male patients [21].
- For Nivolumab monotherapy (vs. Everolimus) the approval trial CheckMate025 resulted in a better OS for male patients [30].
- The TIVO-3 trial demonstrated a favorable PFS for male patients taking Tivozanib (vs. Sorafenib) whereas female patients taking Tivozanib did not benefit [49].

- Male patients seemed to have a better PFS than female patients under Nivolumab + Ipilimumab as shown in a real-world study by Kato et al. [63].
- For the combination of Nivolumab + Cabozantinib (vs. Sunitinib) an OS benefit was solely shown for male mRCC patients (see CheckMate 9ER; [70]).
- A DFS benefit was also exclusively seen for the male subgroup in the Keynote-564 trial, examining Pembrolizumab as an adjuvant therapy (vs. placebo) [74].

Taken together, all statistically significant sex-specific cancer outcomes show a better outcome for male patients.

Possible reasons for the sex-based gaps in enrollment rates are non-eligible co-morbidities or medications among female patients or explicit patient preference (to not take part in a clinical trial). Possible reasons for the seen sex-based gaps in cancer outcomes are, e.g., differences in pharmacodynamics or pharmacokinetics [3], differences in dose modifications and differences in the enrollment rates (underpowered cohort). Additionally, maybe only female patients with a higher disease burden receive treatment. Correspondingly, a recent German retrospective real-world analysis of patients with metastatic urothelial cancer by Niegisch et al. revealed that female sex was a risk factor for not receiving treatment [77]. And last but not least, there is a possibility of confounding factors such as socioeconomic status or residential area (rural vs. urban) influencing cancer outcomes.

Meanwhile there was another drug approved for systemic treatment of mRCC in February 2025: the hypoxia-inducible factor 2alpha inhibitor Belzutifan [78]. The approval was based on the LITESPARK-05 trial [79]. In this phase III randomized controlled trials pretreated clear-cell mRCC patients received either Belzutifan or Everolimus. Among 746 included patients 165 were female, i.e. 22.1 % (not meeting above promoted ratio of 2:1 males:females). There exist preliminary sex-specific outcome calculations. In the second interim analysis there was no relevant OS difference between males and females. The final outcome results are eagerly awaited. There are no sex-specific toxicity analyses published so far [79].

The combination Avelumab + Axitinib was also approved long ago in October 2019 for mRCC, however this combination therapy does not play a key role in the treatment of mRCC due to a lacking OS benefit [80-81]. Hence, this therapy regimen was not primarily included in this systematic review. In the approval trial for Avelumab + Axitinib (JAVELIN Renal 101) there were 25.5% female patients included (i.e. below one third). In the PFS subgroup analysis male patients benefitted from Avelumab + Axitinib (vs. Sunitinib) while female patients did not benefit. There were no sex-specific toxicity analyses published [80].

The major limitation of this systematic review is the absence of any sex-specific toxicity analysis which was declared as a main outcome variable for this review. Another restriction is the limited comparability between prospective clinical trials and real-world analyses. On the one hand there is a selection bias in prospective randomized controlled trials due strict inclusion and exclusion criteria which does not pertain to real-world analyses. On the other hand, there is no independent central review of e.g. CT scans in real-world studies as it is in most of the prospective randomized controlled trials. A meta-analysis was not feasible due to different calculations of HRs in prospective clinical trials and real-world analysis (either it is intervention vs. control/placebo with sex-specific subgroup analyses or it is female vs. male in non-interventional observations).

In conclusion, this systematic review elucidates (I) sex-based gaps in enrollment rates, (II) sex-specific differences in cancer outcomes, and (III) the lack of any sex-specific toxicity analyses in both retrospective and prospective studies focusing on systemic therapies for la/mRCC. Future clinical trials should increase the enrollment rate for female mRCC patients, e.g. by mandatorily performing a sex-based stratification to ensure a balanced (ratio 2:1) representation of males and females. This measure might already affect the sex-specific cancer outcome. The reporting of sex-specific toxicity analyses should also be mandatory in future phase III trials as dose modifications might also serve as an explanation for sex-specific cancer outcomes. Subsequent real-world studies should follow analogously in their study designs.

Acknowledgement

None

#### Statement of Ethics

Ethical approval was not required for this study since it is a review of previously published literature.

#### Conflicts of Interest Statement

Roesch MC:

Lectures/Speaker/Honoraria:

Ipsen, Novartis, Sanofi, Amgen, Pfizer, Merck, Astellas, Bayer, BMS;

Travel grants:

Ipsen, Novartis, Sanofi, Photocure, Amgen, Pfizer, Merck, Astellas;

Advisory board: AstraZeneca, Bayer, MSD, Hexal, Novartis

Stolzenbach LF:

None

Lütje LS:

None

Praus F:

Advisory board. Bayer

Gilbert N:

None

Merseburger AS:

Lectures/Speaker/Honoraria:

Ambu, Amgen, Apogepha, AstraZeneca, Astellas, Bayer, Bristol-Myers Squibb, Eisai, EUSAPharma, Farco, Ferring Ipsen, Hexal, Sandoz, MedUpdate, MSD, Merck Serono, Novartis, Janssen, Pfizer, Takeda, Novartis, Recordati and Roche.

Consultant:

Ambu, Amgen, Apogepha, AstraZeneca, Astellas, Bayer, Bristol-Myers Squibb, Eisai, EUSAPharma, Farco, Ferring Ipsen, Hexal, Sandoz, MedUpdate, MSD, Merck Serono, Novartis, Janssen, Pfizer, Takeda, Novartis, Recordati and Roche.

Research and clinical trials:

AstraZeneca, Astellas, Bayer, Bristol-Myers Squibb, Ipsen, Janssen, EUSAPharma, MSD, Merck Serono, Novartis, Takeda, Teva, Pfizer und Roche.

Osmonov D:

None

#### Funding Sources

This work was supported by the Advanced Clinical Scientist – Program of the University of Luebeck, Germany [grant number: LACS05-2024 to MCR].

#### Author contributions

Conceptualization: MCR, NG, LFS, FP, ASM, DO

Formal analysis, Data curation: MCR, NG, DO, LFS, FP, LSL

Writing – original draft: MCR, LFS, FP, NG

Writing – review and editing: MCR, NG, DO, ASM

Supervision: MCR, NG, DO, ASM

Funding acquisition, Project administration: MCR

All authors reviewed the manuscript.

## Data Availability Statement

The data that support the findings of this study are not publicly available due to confidentiality restrictions but are available from the corresponding author upon request.

Accepted Manuscript

## References

1. Cerrato C, Crocerossa F, Marchioni M, Giannarini G, Gupta S, Albiges L, et al. Effect of Sex on the Oncological Outcomes in Response to Immunotherapy and Antibody-drug Conjugates in Patients with Urothelial and Kidney Cancer: A Systematic Review and a Network Meta-analysis. *Eur Urol Oncol*. 2024 Oct;7(5):1005-1014.
2. Sosinsky AZ, Rich-Edwards JW, Wiley A, Wright K, Spagnolo PA, Joffe H. Enrollment of female participants in United States drug and device phase 1-3 clinical trials between 2016 and 2019. *Contemp Clin Trials*. 2022 Apr;115:106718.
3. Roesch MC, Lütje LS, Gilbert N, Merseburger AS, Osmonov D. Geschlechtsspezifische Unterschiede in uro-onkologischen Studien [Gender-/Sex-Specific Differences in Clinical Trials in Uro-Oncology]. *Aktuelle Urol*. 2025 Apr;56(2):131-134. German.
4. PROSPERO, National Institute for Health and Care Research [Internet]. [Cited 2025 August 22]. Available from: <https://www.crd.york.ac.uk/PROSPERO/view/CRD420251018407>
5. MSD Sharp & Dohme GmbH, Pembrolizumab [Internet]. [Cited 2025 August 22]. Available from: <https://www.merck.com/news/european-commission-approves-mercks-keytruda-pembrolizumab-as-adjuvant-therapy-for-certain-patients-with-renal-cell-carcinoma-rcc-following-surgery/>
6. Choueiri TK, Halabi S, Sanford BL, Hahn O, Michaelson MD, Walsh MK, et al. Cabozantinib Versus Sunitinib As Initial Targeted Therapy for Patients With Metastatic Renal Cell Carcinoma of Poor or Intermediate Risk: The Alliance A031203 CABOSUN Trial. *J Clin Oncol*. 2017 Feb 20;35(6):591-597. Erratum in: *J Clin Oncol*. 2017 Nov 10;35(32):3736. Erratum in: *J Clin Oncol*. 2018 Feb 10;36(5):521.
7. Choueiri TK, Escudier B, Powles T, Mainwaring PN, Rini BI, Donskov F, et al. Cabozantinib versus Everolimus in Advanced Renal-Cell Carcinoma. *N Engl J Med*. 2015 Nov 5;373(19):1814-23.
8. Gan CL, Dudani S, Wells JC, Donskov F, Pal SK, Dizman N, et al. Cabozantinib real-world effectiveness in the first-through fourth-line settings for the treatment of metastatic renal cell carcinoma: Results from the International Metastatic Renal Cell Carcinoma Database Consortium. *Cancer Med*. 2021 Feb;10(4):1212-1221.
9. Procopio G, Prisciandaro M, Iacovelli R, Cortesi E, Fornarini G, Facchini G, et al. Safety and Efficacy of Cabozantinib in Metastatic Renal-Cell Carcinoma: Real-World Data From an Italian Managed Access Program. *Clin Genitourin Cancer*. 2018 Aug;16(4):e945-e951.
10. Narang A, Gebrael G, Jo Y, Thomas VM, Li H, Fortuna GG, et al. Effectiveness of Second-Line Cabozantinib in Metastatic Clear Cell Renal Cell Carcinoma Patients After First-Line Treatment with Immune Checkpoint Inhibitor-based Combinations. *Kidney Cancer*. 2024 Sep 5;8(1):135-142.
11. Nathan P, Venugopal B, Ali J, Allison J, Ceruso M, Charnley N, et al. Real-world Treatment Sequencing and Outcomes With Cabozantinib After First-line Immune Checkpoint Inhibitor-based Combination Therapy For Patients With Advanced Renal Cell Carcinoma: CARINA Study Results. *Clin Genitourin Cancer*. 2024 Oct;22(5):102141.
12. Lolli C, Verde A, Esposti LD, Acciai V, Brigido A, Proietti E, et al. Cabozantinib use in second or subsequent line of treatment in renal cell carcinoma: an analysis of Italian administrative databases. *Glob Reg Health Technol Assess*. 2024 Jul 3;11:154-160.
13. Tomida R, Takahashi M, Matsushita Y, Kojima T, Yamana K, Kandori S, et al. Comparison of Cabozantinib and Axitinib as Second-line Therapy After Nivolumab Plus Ipilimumab in Patients With Metastatic Clear Cell Renal Cell Carcinoma: A Comparative Analysis of Retrospective Real-world Data. *Clin Genitourin Cancer*. 2024 Jun;22(3):102094.
14. Brown J, Harrow B, Marciniak A, McCarthy C, Houchard A, Cirneanu L, et al. Cabozantinib and Axitinib After Vascular Endothelial Growth Factor Therapy in Patients with Advanced Renal Cell Carcinoma: A Retrospective Cohort Study from England. *Drugs Real World Outcomes*. 2024 Jun;11(2):195-207.

15. Domański P, Jarosińska J, Kruczyk B, Piętak M, Mydlak A, Demkow T, et al. Activity of cabozantinib in further line treatment of metastatic clear cell renal cell carcinoma. Real-world experience in a single-center retrospective study. *Contemp Oncol (Pozn)*. 2023;27(3):190-197.
16. Sazuka T, Matsushita Y, Sato H, Osawa T, Hinata N, Hatakeyama S, et al. Efficacy and safety of second-line cabozantinib after immuno-oncology combination therapy for advanced renal cell carcinoma: Japanese multicenter retrospective study. *Sci Rep*. 2023 Nov 23;13(1):20629.
17. Ishihara H, Nemoto Y, Tachibana H, Fukuda H, Yoshida K, Kobayashi H, et al. Real-world efficacy and safety of cabozantinib following immune checkpoint inhibitor failure in Japanese patients with advanced renal cell carcinoma. *Jpn J Clin Oncol*. 2023 Oct 4;53(10):977-983.
18. Navani V, Wells JC, Boyne DJ, Cheung WY, Brenner DM, McGregor BA, et al. CABOSEQ: The Effectiveness of Cabozantinib in Patients With Treatment Refractory Advanced Renal Cell Carcinoma: Results From the International Metastatic Renal Cell Carcinoma Database Consortium (IMDC). *Clin Genitourin Cancer*. 2023 Feb;21(1):106.e1-106.e8.
19. Santoni M, Aurilio G, Massari F, Grande E, Matrana MR, Rizzo M, et al. Nivolumab VERSUS Cabozantinib as Second-Line Therapy in Patients With Advanced Renal Cell Carcinoma: A Real-World Comparison. *Clin Genitourin Cancer*. 2022 Jun;20(3):285-295.
20. Venugopal B, Pillai M, Powles T, Savage P, Michael A, Fife K, et al. Early Clinical Experience with Cabozantinib for Advanced Renal Cell Carcinoma in the UK: Real-World Treatment Pathways and Clinical Outcomes. *Clin Genitourin Cancer*. 2022 Feb;20(1):94-94.e10.
21. Santoni M, Massari F, Grande E, Procopio G, Matrana MR, Rizzo M, et al. Cabozantinib in Pretreated Patients with Metastatic Renal Cell Carcinoma with Sarcomatoid Differentiation: A Real-World Study. *Target Oncol*. 2021 Sep;16(5):625-632.
22. Santoni M, Heng DY, Bracarda S, Procopio G, Milella M, Porta C, et al. Real-World Data on Cabozantinib in Previously Treated Patients with Metastatic Renal Cell Carcinoma: Focus on Sequences and Prognostic Factors. *Cancers (Basel)*. 2019 Dec 30;12(1):84.
23. Stukalin I, Wells JC, Graham J, Yuasa T, Beuselinck B, Kollmansberger C, et al. Real-world outcomes of nivolumab and cabozantinib in metastatic renal cell carcinoma: results from the International Metastatic Renal Cell Carcinoma Database Consortium. *Curr Oncol*. 2019 Apr;26(2):e175-e179.
24. Bodnar L, Kopczyńska A, Żołnierek J, Wieczorek-Rutkowska M, Chrom P, Tomczak P. Real-world Experience of Cabozantinib as Second- or Subsequent Line Treatment in Patients With Metastatic Renal Cell Carcinoma: Data From the Polish Managed Access Program. *Clin Genitourin Cancer*. 2019 Jun;17(3):e556-e564.
25. Albiges L, Fléchon A, Chevreau C, Topart D, Gravis G, Oudard S, et al. Real-world evidence of cabozantinib in patients with metastatic renal cell carcinoma: Results from the CABOREAL Early Access Program. *Eur J Cancer*. 2021 Jan;142:102-111.
26. Staehler M, Basso U, Eymard JC, Barthelemy P, Bigot P, Laramas M, et al. A Prospective Non-interventional Real-World Study of cabozantinib in Pretreated Patients With Advanced Renal Cell Carcinoma Refractory to Vascular Endothelial Growth Factor-Targeted Therapy (CASSIOPE). *Clin Genitourin Cancer*. 2025 Feb;23(1):102285.
27. Graham J, Ghosh S, Breau RH, Wood L, Tanguay S, Bosse D, et al. Association of Cabozantinib Dose Reductions for Toxicity With Clinical Effectiveness in Metastatic Renal Cell Carcinoma (mRCC): Results From the Canadian Kidney Cancer Information System (CKCis). *Clin Genitourin Cancer*. 2024 Jun;22(3):102060.
28. Bruchbacher A, Franke J, Alimohammadi A, Laukhtina E, Fajkovic H, Schmidinger M. Real-World Results of Cabozantinib Given as Alternative Schedule in Metastatic Renal Cell Carcinoma. *Clin Genitourin Cancer*. 2024 Apr;22(2):98-108.
29. Zhang H, Basappa NS, Ghosh S, Joy I, Lalani AKA, Hansen AR, et al. Real-World Experience of Cabozantinib in Metastatic Renal Cell Carcinoma (mRCC): Results from the Canadian Kidney Cancer information system (CKCis). *Kidney Cancer*. 2021;5(1):21-29.
30. Motzer RJ, Escudier B, McDermott DF, George S, Hammers HJ, Srinivas S, et al. Nivolumab versus Everolimus in Advanced Renal-Cell Carcinoma. *N Engl J Med*. 2015 Nov 5;373(19):1803-13.

31. De Giorgi U, Carteni G, Giannarelli D, Basso U, Galli L, Cortesi E, et al. Safety and efficacy of nivolumab for metastatic renal cell carcinoma: real-world results from an expanded access programme. *BJU Int.* 2019 Jan;123(1):98-105.
32. Hinata N, Yonese J, Masui S, Nakai Y, Shirotake S, Tatsugami K, et al. A multicenter retrospective study of nivolumab monotherapy in previously treated metastatic renal cell carcinoma patients: interim analysis of Japanese real-world data. *Int J Clin Oncol.* 2020 Aug;25(8):1533-1542.
33. Grimm MO, Grünwald V, Müller-Huesmann H, Ivanyi P, Schostak M, von der Heyde E, et al. Real-World Data on the Use of Nivolumab Monotherapy in the Treatment of Advanced Renal Cell Carcinoma after Prior Therapy: Interim Results from the Noninterventional NORA Study. *Eur Urol Focus.* 2022 Sep;8(5):1289-1299.
34. Uemura H, Tomita Y, Nonomura N, Yoshizaki K, Nakao T, Shinohara N. Real-world safety and effectiveness of nivolumab for advanced renal cell carcinoma in Japan: a post-marketing surveillance. *Int J Clin Oncol.* 2022 Jun;27(6):1061-1067.
35. Waddell T, Fife K, Griffiths R, Sharma A, Dhokia P, Groves L, et al. Real-world treatment sequencing and survival in previously treated advanced renal cell carcinoma patients receiving nivolumab monotherapy: a UK retrospective cohort study. *BMC Cancer.* 2022 Jun 6;22(1):617.
36. Rauthan A, Murthy NY, Patil P, Nigade G, Somashekhar SP, Zaveri SS. Real-World Experience with Nivolumab in Metastatic Renal Cell Carcinoma Patients Who Have Progressed on Prior Therapies: A Single-Center Study from India. *South Asian J Cancer.* 2022 Feb 11;11(2):133-139.
37. Barthélémy P, Albigès L, Escudier B, Narciso B, Bigot P, Chehimi M, et al. Nivolumab in patients with advanced renal cell carcinoma in France: interim results of the observational, real-world WITNESS study. *ESMO Open.* 2024 Jul;9(7):103602.
38. Yonese J, Hinata N, Masui S, Nakai Y, Shirotake S, Takeuchi A, et al. Real-world effectiveness of nivolumab and subsequent therapy in Japanese patients with metastatic renal cell carcinoma (POST-NIVO study): 36-month follow-up results of a clinical chart review. *Int J Urol.* 2023 Sep;30(9):762-771.
39. Stühler V, Herrmann L, Rausch S, Stenzl A, Bedke J. Real world data on IO-based therapy for metastatic renal cell carcinoma. *J Cancer Res Clin Oncol.* 2023 Jul;149(7):3249-3258.
40. Verhaart SL, Abu-Ghanem Y, Mulder SF, Oosting S, Van Der Veldt A, Osanto S, et al. Real-world Data of Nivolumab for Patients With Advanced Renal Cell Carcinoma in the Netherlands: An Analysis of Toxicity, Efficacy, and Predictive Markers. *Clin Genitourin Cancer.* 2021 Jun;19(3):274.e1-274.e16.
41. Vrdoljak E, Magri C, Gamulin M, Bošković L, Omrčen T, Bajić Ž, et al. Real-world safety and efficacy of nivolumab for  $\geq 2$ nd line treatment of metastatic renal cell carcinoma: A retrospective cohort study in Croatia, Hungary, and Malta. *Neoplasma.* 2021 Jan;68(1):208-215.
42. Ishihara H, Nemoto Y, Tachibana H, Fukuda H, Yoshida K, Kobayashi H, et al. Outcomes of nivolumab monotherapy for previously treated metastatic renal cell carcinoma: a real-world multi-institution data with a minimum of 2 years of follow-up. *Jpn J Clin Oncol.* 2022 Jul 8;52(7):785-790.
43. Ishihara H, Fukuda H, Takagi T, Kondo T, Tachibana H, Yoshida K, et al. Efficacy of nivolumab versus molecular-targeted therapy as second-line therapy for metastatic renal cell carcinoma: Real-world data from two Japanese institutions. *Int J Urol.* 2021 Jan;28(1):99-106.
44. José JM, Jose M, Silverio R, Federico V, Isabel C, Martin OA, et al. Eastern Spanish experience with nivolumab in metastatic renal cell carcinoma. *Clin Transl Oncol.* 2020 Sep;22(9):1517-1523.
45. Motzer RJ, Hutson TE, Glen H, Michaelson MD, Molina A, Eisen T, et al. Lenvatinib, everolimus, and the combination in patients with metastatic renal cell carcinoma: a randomised, phase 2, open-label, multicentre trial. *Lancet Oncol.* 2015 Nov;16(15):1473-1482. Erratum in: *Lancet Oncol.* 2016 Jul;17(7):e270. Erratum in: *Lancet Oncol.* 2018 Oct;19(10):e509.

46. Hamieh L, Beck RL, Le VH, Hsieh JJ. The Efficacy of Lenvatinib Plus Everolimus in Patients with Metastatic Renal Cell Carcinoma Exhibiting Primary Resistance to Front-Line Targeted Therapy or Immunotherapy. *Clin Genitourin Cancer*. 2020 Aug;18(4):252-257.e2.
47. Wiele AJ, Bathala TK, Hahn AW, Xiao L, Duran M, Ross JA, et al. Lenvatinib with or Without Everolimus in Patients with Metastatic Renal Cell Carcinoma After Immune Checkpoint Inhibitors and Vascular Endothelial Growth Factor Receptor-Tyrosine Kinase Inhibitor Therapies. *Oncologist*. 2021 Jun;26(6):476-482.
48. Motzer RJ, Nosov D, Eisen T, Bondarenko I, Lesovoy V, Lipatov O, et al. Tivozanib versus sorafenib as initial targeted therapy for patients with metastatic renal cell carcinoma: results from a phase III trial. *J Clin Oncol*. 2013 Oct 20;31(30):3791-9.
49. Rini BI, Pal SK, Escudier BJ, Atkins MB, Hutson TE, Porta C, et al. Tivozanib versus sorafenib in patients with advanced renal cell carcinoma (TIVO-3): a phase 3, multicentre, randomised, controlled, open-label study. *Lancet Oncol*. 2020 Jan;21(1):95-104.
50. Basso U, Procopio G, Fornarini G, Massari F, Bearz A, Fratino L, et al. Safety and Efficacy of Tivozanib in First-Line mRCC: A Multicenter Compassionate-Use Study (Meet-Uro 16). *Oncology*. 2021;99(12):747-755.
51. Johns AC, Campbell MT, Gao M, Hahn AW, Lim Z, Wang E, et al. Efficacy, Safety, and Tolerability of Tivozanib in Heavily Pretreated Patients With Advanced Clear Cell Renal Cell Carcinoma. *Oncologist*. 2024 Jul 5;29(7):589-595.
52. Rini BI, Plimack ER, Stus V, Gafanov R, Hawkins R, Nosov D, et al. Pembrolizumab plus Axitinib versus Sunitinib for Advanced Renal-Cell Carcinoma. *N Engl J Med*. 2019 Mar 21;380(12):1116-1127.
53. Lai GS, Li JR, Wang SS, Chen CS, Yang CK, Lin CY, et al. Real world treatment sequences and outcomes for metastatic renal cell carcinoma. *PLoS One*. 2023 Nov 22;18(11):e0294039.
54. Shah NJ, Sura SD, Shinde R, Shi J, Singhal P, Perini RF, et al. Real-world clinical outcomes of patients with metastatic renal cell carcinoma receiving pembrolizumab + axitinib vs. ipilimumab + nivolumab. *Urol Oncol*. 2023 Nov;41(11):459.e1-459.e8.
55. Harada KI, Sato R, Bando Y, Sano A, Matsushita Y, Tamura K, et al. Efficacy and safety of pembrolizumab and axitinib as first-line treatment for patients with advanced renal cell carcinoma: Real-world experience in Japan. *Int J Urol*. 2023 Sep;30(9):772-777.
56. Shah NJ, Sura SD, Shinde R, Shi J, Singhal PK, Robert NJ, et al. Real-world Treatment Patterns and Clinical Outcomes for Metastatic Renal Cell Carcinoma in the Current Treatment Era. *Eur Urol Open Sci*. 2023 Feb 6;49:110-118.
57. Zarrabi KK, Handorf E, Miron B, Zibelman MR, Anari F, Ghatalia P, et al. Comparative Effectiveness of Front-Line Ipilimumab and Nivolumab or Axitinib and Pembrolizumab in Metastatic Clear Cell Renal Cell Carcinoma. *Oncologist*. 2023 Feb 8;28(2):157-164.
58. Zakharia Y, Thomaidou D, Li B, Siu G, Levin R, Vlahiotis A, et al. Real-World Therapy Management and Outcomes of First-Line Axitinib Plus Pembrolizumab in Patients With Advanced Renal Cell Carcinoma in the United States. *Front Oncol*. 2022 May 19;12:861189.
59. Hoeh B, Schmucker P, Klümper N, Hahn O, Zeuschner P, Banek S, et al. Comparison of First-Line Anti-PD-1-Based Combination Therapies in Metastatic Renal-Cell Carcinoma: Real-World Experiences from a Retrospective, Multi-Institutional Cohort. *Urol Int*. 2022;106(11):1150-1157.
60. Guida A, Gili A, Mosillo C, Maruzzo M, Lai E, Pierantoni F, et al. Efficacy and Safety of Pembrolizumab plus Axitinib combination for Metastatic Renal Cell Carcinoma in a Real-World Scenario: Data From the Prospective ProPAXI Study. *Clin Genitourin Cancer*. 2024 Dec;22(6):102225.
61. Motzer RJ, Tannir NM, McDermott DF, Arén Frontera O, Melichar B, Choueiri TK, et al. Nivolumab plus Ipilimumab versus Sunitinib in Advanced Renal-Cell Carcinoma. *N Engl J Med*. 2018 Apr 5;378(14):1277-1290.
62. Tanaka T, Hatakeyama S, Numakura K, Kido K, Noro D, Oikawa M, et al. Efficacy and safety of first-line nivolumab plus ipilimumab in patients with metastatic renal cell carcinoma: A multicenter retrospective study. *Int J Urol*. 2020 Dec;27(12):1095-1100.

63. Kato R, Kojima T, Sazuka T, Yamamoto H, Fukuda S, Yamana K, et al. A Multicentre Retrospective Study of Nivolumab Plus Ipilimumab for Untreated Metastatic Renal Cell Carcinoma. *Anticancer Res.* 2021 Dec;41(12):6199-6209.
64. Meerveld-Eggink A, Graafland N, Wilgenhof S, Van Thienen JV, Lalezari F, Grant M, et al. Primary Renal Tumour Response in Patients Treated with Nivolumab and Ipilimumab for Metastatic Renal Cell Carcinoma: Real-world Data Assessment. *Eur Urol Open Sci.* 2022 Jan 3;35:54-58.
65. Ishihara H, Omae K, Nemoto Y, Ishiyama R, Tachibana H, Nishimura K, et al. First-line dual immune checkpoint inhibitor therapies versus combination therapies comprising immune checkpoint inhibitors and tyrosine kinase inhibitors for advanced renal cell carcinoma: a comparative analysis of the effectiveness using real-world data. *Int J Clin Oncol.* 2024 Apr;29(4):473-480.
66. Ishihara H, Yuki N, Ishiyama R, Ikeda T, Kobari Y, Fukuda H, et al. Real-world outcomes of nivolumab plus ipilimumab combination therapy for advanced renal cell carcinoma in Japanese patients: data with a minimum of 3 years of follow-up. *Jpn J Clin Oncol.* 2024 May 7;54(5):577-583.
67. Kato T, Fujita K, Minami T, Nagahara A, Hyashi Y, Nakata W, et al. Real-world efficacy and safety of nivolumab plus ipilimumab in untreated metastatic renal cell carcinoma, and the impact of previous nephrectomy on clinical outcome: Japanese multi-institutional retrospective study. *Int J Clin Oncol.* 2022 Oct;27(10):1596-1604.
68. Thana M, Basappa NS, Ghosh S, Kollmannsberger CK, Heng DY, Hansen AR, et al. Utilization and Safety of Ipilimumab Plus Nivolumab in a Real-World Cohort of Metastatic Renal Cell Carcinoma Patients. *Clin Genitourin Cancer.* 2022 Jun;20(3):210-218.
69. Taniguchi T, Inuma K, Kawada K, Ishida T, Takagi K, Tomioka M, et al. Real-World Oncological Outcomes of Nivolumab Plus Ipilimumab in Advanced or Metastatic Renal Cell Carcinoma: A Multicenter, Retrospective Cohort Study in Japan. *Curr Oncol.* 2024 Dec 11;31(12):7914-7923.
70. Choueiri TK, Powles T, Burotto M, Escudier B, Bourlon MT, Zurawski B, et al. Nivolumab plus Cabozantinib versus Sunitinib for Advanced Renal-Cell Carcinoma. *N Engl J Med.* 2021 Mar 4;384(9):829-841.
71. Hilser T, Darr C, Niegisch G, Schnabel MJ, Foller S, Häuser L, et al. Cabozantinib Plus Nivolumab in Adult Patients with Advanced or Metastatic Renal Cell Carcinoma: A Retrospective, Non-Interventional Study in a Real-World Cohort/GUARDIANS Project. *Cancers (Basel).* 2024 Aug 28;16(17):2998.
72. Motzer R, Alekseev B, Rha SY, Porta C, Eto M, Powles T, et al. Lenvatinib plus Pembrolizumab or Everolimus for Advanced Renal Cell Carcinoma. *N Engl J Med.* 2021 Apr 8;384(14):1289-1300.
73. Hara T, Suzuki K, Okamura Y, Chiba K, Sato R, Matsushita Y, et al. Efficacy and safety of lenvatinib and pembrolizumab as first-line treatment for advanced renal cell carcinoma patients: real-world experience in Japan. *Int J Clin Oncol.* 2024 Dec;29(12):1931-1936.
74. Choueiri TK, Tomczak P, Park SH, Venugopal B, Ferguson T, Chang YH, et al. Adjuvant Pembrolizumab after Nephrectomy in Renal-Cell Carcinoma. *N Engl J Med.* 2021 Aug 19;385(8):683-694.
75. Mattigk A, Cano Garcia C, Klümper N, Cox A, Hahn O, Junker K, et al. Adjuvant Therapy with Pembrolizumab in Renal Cell Carcinoma: Real-World Experiences from a Retrospective, Multi-Institutional Cohort. *Urol Int.* 2025;109(3):291-298.
76. Rosiello G, Pecoraro A, Deuker M, Stolzenbach LF, Martin T, Tian Z, et al. The impact of sex and age on distribution of metastases in patients with renal cell carcinoma. *Int J Clin Oncol.* 2021 May;26(5):962-970.
77. Niegisch G, Grimm MO, Hardtstock F, Krieger J, Starry A, Osowski U, et al. Treatment patterns and clinical outcomes in metastatic urothelial carcinoma: a German retrospective real-world analysis. *Future Oncol.* 2024;20(19):1351-1366.
78. MSD Sharp & Dohme GmbH, Belzutifan [Internet]. [Cited 2025 August 22]. Available from: <https://www.merck.com/news/welireg-belzutifan-receives-first-european-commission-approval-for-two-indications/>

79. Choueiri TK, Powles T, Peltola K, de Velasco G, Burotto M, Suarez C, et al. Belzutifan versus Everolimus for Advanced Renal-Cell Carcinoma. *N Engl J Med*. 2024 Aug 22;391(8):710-721.
80. Motzer RJ, Penkov K, Haanen J, Rini B, Albiges L, Campbell MT, et al. Avelumab plus Axitinib versus Sunitinib for Advanced Renal-Cell Carcinoma. *N Engl J Med*. 2019 Mar 21;380(12):1103-1115.
81. Choueiri TK, Penkov K, Uemura H, Campbell MT, Pal S, Kollmannsberger C, et al. Avelumab + axitinib versus sunitinib as first-line treatment for patients with advanced renal cell carcinoma: final analysis of the phase III JAVELIN Renal 101 trial. *Ann Oncol*. 2025 Apr;36(4):387-392.

Figure Legends

Fig. 1. Search and selection process.

Accepted Manuscript

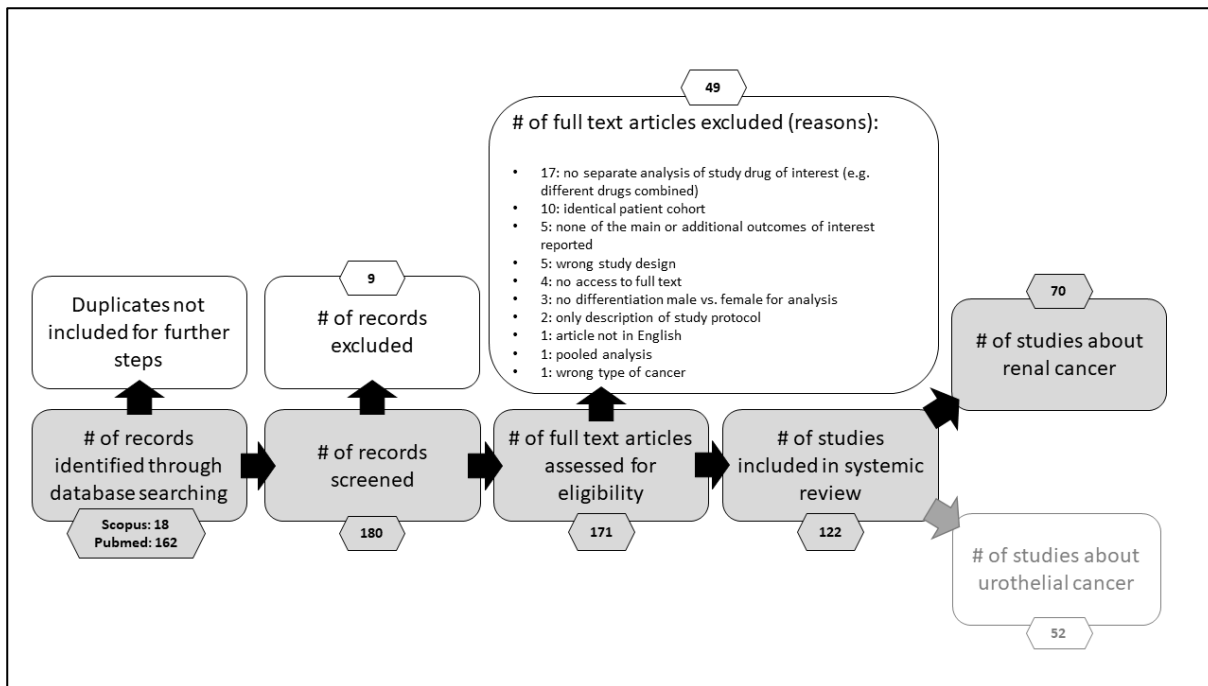

Accepted Manuscript

Table 1

Table 1: Cabozantinib in metastatic renal cell cancer

| Trial<br>PMID (or DOI number) | First Author<br>Year of publication | Study Design<br>Study drug(s)                                | Patient numbers<br>All [n]<br>Female<br>[n;%]                                                                                                                 | Follow-Up (median)<br>[months]         | Overall Survival                                                        | Progression-Free Survival                                            | Discontinuation of treatment                       | Annotation      |
|-------------------------------|-------------------------------------|--------------------------------------------------------------|---------------------------------------------------------------------------------------------------------------------------------------------------------------|----------------------------------------|-------------------------------------------------------------------------|----------------------------------------------------------------------|----------------------------------------------------|-----------------|
|                               |                                     |                                                              |                                                                                                                                                               |                                        | HR <sup>a</sup> (95% CI <sup>b</sup> )                                  | HR (95% CI)                                                          | Male<br>Female<br>[%]                              |                 |
| <i>Approval studies</i>       |                                     |                                                              |                                                                                                                                                               |                                        |                                                                         |                                                                      |                                                    |                 |
| CABOSUN<br>28199818<br>[6]    | Choueiri TK<br>2017                 | Phase II<br>Cabozantinib vs.<br>Sunitinib                    | All: 157<br>Female: 34<br>(21.7)                                                                                                                              | 21.4                                   | Male: n/a <sup>c</sup><br>Female: n/a                                   | Male: n/a<br>Female: n/a                                             | Male: n/a<br>Female: n/a                           | 1L <sup>d</sup> |
| METEOR<br>26406150<br>[7]     | Choueiri TK<br>2015                 | Phase III<br>Cabozantinib vs.<br>Everolimus                  | All: 658<br>Female:<br>163 (24.8)                                                                                                                             | n/a                                    | Male: n/a<br>Female: n/a                                                | Male: n/a<br>Female: n/a                                             | Male: n/a<br>Female: n/a                           | >1L             |
| <i>Real world data</i>        |                                     |                                                              |                                                                                                                                                               |                                        |                                                                         |                                                                      |                                                    |                 |
| 33463028<br>[8]               | Gan CL<br>2021                      | Multicenter<br>Retrospective<br>Cabozantinib                 | <u>1L</u><br>All: 34<br>Female: 4<br>(11.8)<br><u>2L</u><br>All: 143<br>Female: 28<br>(19.6)<br><br><u>Entire cohort:</u><br>All: 413<br>Female: 86<br>(20.8) | <u>1L</u><br>14.7<br><u>2L</u><br>14.5 | <u>1L &amp; 2L</u><br>Male: n/a<br><br>Female: n/a                      | <u>1L &amp; 2L</u><br>Male: n/a<br><br>Female: n/a                   | <u>1L &amp; 2L</u><br>Male: n/a<br><br>Female: n/a | 1L & >1L        |
| 29753637<br>[9]               | Procopio G<br>2018                  | Multicenter<br>Retrospective<br>Cabozantinib                 | All: 96<br>Female: 23<br>(24.0)                                                                                                                               | n/a                                    | Male: n/a<br>Female: n/a                                                | Male: n/a<br>Female: n/a                                             | Male: n/a<br>Female: n/a                           | >1L             |
| 39263256<br>[10]              | Narang A<br>2024                    | Multicenter<br>Retrospective<br>Cabozantinib                 | All: 237<br>Female: 69<br>(29.1)                                                                                                                              | n/a                                    | Male: n/a<br>Female: n/a                                                | Male: n/a<br>Female: n/a                                             | Male: n/a<br>Female: n/a                           | >1L             |
| CARINA<br>39107157<br>[11]    | Nathan P<br>2024                    | Multicenter<br>Retrospective<br>Cabozantinib                 | All: 163<br>Female: 40<br>(24.5)                                                                                                                              | 15.7                                   | Male: n/a<br>Female: n/a                                                | Male: n/a<br>Female: n/a                                             | Male: n/a<br>Female: n/a                           | >1L             |
| 38979548<br>[12]              | Lolli C<br>2024                     | Multicenter<br>Retrospective<br>Cabozantinib                 | All: 113<br>Female: 29<br>(25.7)                                                                                                                              | n/a                                    | Male: n/a<br>Female: n/a                                                | Male: n/a<br>Female: n/a                                             | Male: n/a<br>Female: n/a                           | >1L             |
| 38714434<br>[13]              | Tomida R<br>2024                    | Multicenter<br>Retrospective<br>Cabozantinib vs.<br>Axitinib | All: 108<br>Female: 28<br>(25.9)                                                                                                                              | 14                                     | Male: 0.873<br>(0.394; 1.934)<br><br>Female:<br>1.447 (0.462;<br>4.528) | Male: 0.791 (0.449;<br>1.395)<br><br>Female:<br>1.133 (0.441; 2.909) | Male: n/a<br>Female: n/a                           | >1L             |
| 38265633<br>[14]              | Brown J<br>2024                     | Multicenter<br>Retrospective                                 | All: 1485<br>Female:                                                                                                                                          | Cabozantinib<br>25.8                   | Male: n/a                                                               | Male: n/a                                                            | Male: n/a                                          | >1L             |

|                                 |                    |                                                      |                                |               |                                                |                                                       |                          |            |
|---------------------------------|--------------------|------------------------------------------------------|--------------------------------|---------------|------------------------------------------------|-------------------------------------------------------|--------------------------|------------|
|                                 |                    | Cabozantinib vs. Axitinib                            | 414 (27.9)                     | Axitinib 30.8 | Female: n/a                                    | Female: n/a                                           | Female: n/a              |            |
| 38239858 [15]                   | Domanski P 2023    | Monocenter Retrospective Cabozantinib                | All: 71<br>Female: 25 (35.2)   | n/a           | Male: n/a<br>Female: n/a                       | Male: n/a<br>Female: n/a                              | Male: n/a<br>Female: n/a | >1L        |
| 37996622 [16]                   | Sazuka T 2023      | Multicenter Retrospective Cabozantinib               | All: 118<br>Female: 25 (21.2)  | 10.5          | Male: n/a<br>Female: n/a                       | Male vs. Female (REF <sup>e</sup> ) 0.44 (0.17; 1.10) | Male: n/a<br>Female: n/a | >1L        |
| 37519060 [17]                   | Ishihara H 2023    | Multicenter Retrospective Cabozantinib               | All: 56<br>Female: 16 (28.6)   | 10.3          | Male: n/a<br>Female: n/a                       | Male vs. Female (REF) 1.56 (0.63; 3.84)               | Male: n/a<br>Female: n/a | >1L        |
| CABOSEQ 35945133 [18]           | Navani V 2023      | Multicenter Retrospective Cabozantinib               | All: 346<br>Female: 74 (21.4)  | n/a           | Male: n/a<br>Female: n/a                       | Male: n/a<br>Female: n/a                              | Male: n/a<br>Female: n/a | >1L        |
| 35305916 [19]                   | Santoni M 2022     | Multicenter Retrospective Cabozantinib vs. Nivolumab | All: 343<br>Female: 95 (27.7)  | n/a           | Male: n/a<br>Female: n/a                       | Male: n/a<br>Female: n/a                              | Male: n/a<br>Female: n/a | >1L        |
| CERES 34802966 [20]             | Venugopal B 2022   | Multicenter Retrospective Cabozantinib               | All: 100<br>Female: 32 (32.0)  | 10.8          | Male: n/a<br>Female: n/a                       | Male: n/a<br>Female: n/a                              | Male: n/a<br>Female: n/a | >1L        |
| 34338966 [21]                   | Santoni M 2021     | Multicenter Retrospective Cabozantinib               | All: 66<br>Female: 30 (45.5)   | 23.7          | <b>Male (REF) vs. Female 2.00 (1.07; 3.73)</b> | <b>Male (REF) vs. Female 1.92 (1.03; 3.60)</b>        | Male: n/a<br>Female: n/a | >1L        |
| 31905816 [22]                   | Santoni M 2019     | Multicenter Retrospective Cabozantinib               | All: 237<br>Female: 63 (26.6)  | 182.8         | Male: n/a<br>Female: n/a                       | Male: n/a<br>Female: n/a                              | Male: n/a<br>Female: n/a | >1L        |
| 31043824 [23]                   | Stukalin I 2019    | Multicenter Retrospective Cabozantinib vs. Nivolumab | All: 278<br>Female: 56 (20.1)  | n/a           | Male: n/a<br>Female: n/a                       | Male: n/a<br>Female: n/a                              | Male: n/a<br>Female: n/a | >1L        |
| 30987807 [24]                   | Bodnar L 2019      | Multicenter Retrospective Cabozantinib               | All: 115<br>Female: 31 (27.0)  | 12.6          | Male: n/a<br>Female: n/a                       | Male: n/a<br>Female: n/a                              | Male: n/a<br>Female: n/a | >1L        |
| CABOREAL 33253997 [25]          | Albiges L 2021     | Multicenter Retrospective Cabozantinib               | All: 410<br>Female: 106 (25.9) | 14.4          | Male: n/a<br>Female: n/a                       | Male: n/a<br>Female: n/a                              | Male: n/a<br>Female: n/a | >1L        |
| CASSIOPE 39740313 [26]          | Staehtler M 2025   | Multicenter Prospective Cabozantinib                 | All: 679<br>Female: 183 (27.0) | n/a           | Male: n/a<br>Female: n/a                       | Male: n/a<br>Female: n/a                              | Male: n/a<br>Female: n/a | >1L        |
| 38521648 [27]                   | Graham J 2024      | Multicenter Retrospective Cabozantinib               | All: 319<br>Female: 77 (24.1)  | 16.4          | Male: n/a<br>Female: n/a                       | Male: n/a<br>Female: n/a                              | Male: n/a<br>Female: n/a | >1L        |
| 37926597 [28]                   | Bruchbacher A 2024 | Monocenter Retrospective Cabozantinib                | All: 71<br>Female: 16 (22.5)   | 14.3          | Male: n/a<br>Female: n/a                       | Male: n/a<br>Female: n/a                              | Male: n/a<br>Female: n/a | 1L and >1L |
| doi.org/10.3233/KCA-210110 [29] | Zhang H 2021       | Multicenter Retrospective Cabozantinib               | All: 157<br>Female: 39 (24.8)  | 9.6           | Male: n/a<br>Female: n/a                       | Male: n/a<br>Female: n/a                              | Male: n/a<br>Female: n/a | >1L        |

a: HR: hazard ratio, b: CI: confidence interval, c: n/a: not available, d: L: line, e: REF: reference

Table 2

Table 2: Nivolumab in metastatic renal cell cancer

| Trial<br>PMID                    | First Author<br>Year of<br>publication | Study Design<br>Study drug(s)             | Patient numbers<br>All [n]<br>Female [n;%]                                   | Follow-Up<br>(median)<br>[months]          | Overall<br>Survival                                                  | Progression-Free<br>Survival                  | Discontinuation of<br>treatment | Annotation |
|----------------------------------|----------------------------------------|-------------------------------------------|------------------------------------------------------------------------------|--------------------------------------------|----------------------------------------------------------------------|-----------------------------------------------|---------------------------------|------------|
|                                  |                                        |                                           |                                                                              |                                            | HR <sup>a</sup> (95% CI)                                             | HR (95% CI) <sup>b</sup>                      | Male<br>Female<br>[%]           |            |
| <i>Approval studies</i>          |                                        |                                           |                                                                              |                                            |                                                                      |                                               |                                 |            |
| Checkmate025<br>26406148<br>[30] | Motzer RJ<br>2015                      | Phase III<br>Nivolumab vs.<br>Everolimus  | All: 821<br>Female: 202<br>(24.6)                                            | minimum 14                                 | <b>Male: 0.73<br/>(0.58; 0.92)<br/>Female: 0.84<br/>(0.57; 1.24)</b> | Male: n/a <sup>c</sup><br>Female: n/a         | Male: n/a<br>Female: n/a        |            |
| <i>Real world data</i>           |                                        |                                           |                                                                              |                                            |                                                                      |                                               |                                 |            |
| 29956884<br>[31]                 | De Giorgi U<br>2019                    | Multicenter<br>Prospective<br>Nivolumab   | All: 389<br>Female: 98 (25.2)                                                | 11.9                                       | Male vs.<br>Female (REF)<br>1.18 (0.82;<br>1.71)                     | Male: n/a<br>Female: n/a                      | Male: n/a<br>Female: n/a        |            |
| 32519026<br>[32]                 | Hinata N<br>2020                       | Multicenter<br>Retrospective<br>Nivolumab | All: 208<br>Female: 50 (24.0)                                                | Minimum 9                                  | Male: n/a<br>Female: n/a                                             | Male: n/a<br>Female: n/a                      | Male: n/a<br>Female: n/a        |            |
| NORA<br>34953677<br>[33]         | Grimm MO<br>2022                       | Multicenter<br>Prospective<br>Nivolumab   | All: 228<br>Female: 65 (28.5)                                                | 37                                         | Male: n/a<br>Female: n/a                                             | Male: n/a<br>Female: n/a                      | Male: n/a<br>Female: n/a        |            |
| 35441907<br>[34]                 | Uemura H<br>2022                       | Multicenter<br>Prospective<br>Nivolumab   | All: 555<br>Female: 123<br>(22.2)                                            | n/a                                        | Male: n/a<br>Female: n/a                                             | Male: n/a<br>Female: n/a                      | Male: n/a<br>Female: n/a        |            |
| 35668384<br>[35]                 | Waddell T<br>2022                      | Multicenter<br>Retrospective<br>Nivolumab | All: 151<br>Female: 42 (27.8)                                                | 15.2                                       | Male: n/a<br>Female: n/a                                             | Male: n/a<br>Female: n/a                      | Male: n/a<br>Female: n/a        |            |
| 36466979<br>[36]                 | Rauthan A<br>2022                      | Monocenter<br>Retrospective<br>Nivolumab  | All: 35<br>Female: 7 (20.0)                                                  | 19                                         | Male: n/a<br>Female: n/a                                             | Male: n/a<br>Female: n/a                      | Male: n/a<br>Female: n/a        |            |
| WITNESS<br>38897136<br>[37]      | Barthelemy<br>P<br>2024                | Multicenter<br>Prospective<br>Nivolumab   | All: 325<br>Female: 90 (27.7)                                                | 12.3                                       | Male: n/a<br>Female: n/a                                             | Male: n/a<br>Female: n/a                      | Male: n/a<br>Female: n/a        |            |
| POST-NIVO<br>37248753<br>[38]    | Yonese J<br>2023                       | Multicenter<br>Retrospective<br>Nivolumab | All: 208<br>Female: 50 (24.0)                                                | n/a<br>(36-month<br>follow-up<br>analysis) | Male: n/a<br>Female: n/a                                             | Male: n/a<br>Female: n/a                      | Male: n/a<br>Female: n/a        |            |
| 35907009<br>[39]                 | Stühler V<br>2023                      | Monocenter<br>Retrospective<br>Nivolumab  | All (Nivolumab as<br>≥2L): 40<br>Female<br>(Nivolumab as<br>≥2L): 14 (35.0%) | n/a                                        | Male: n/a<br>Female: n/a                                             | Male: n/a<br>Female: n/a                      | Male: n/a<br>Female: n/a        |            |
| 33317946<br>[40]                 | Verhaart SL<br>2021                    | Multicenter<br>Retrospective<br>Nivolumab | All: 264<br>Female: 64 (24.2)                                                | 12.2                                       | Male: n/a<br>Female: n/a                                             | Male: n/a<br>Female: n/a                      | Male: n/a<br>Female: n/a        |            |
| 32940046<br>[41]                 | Vrdoljak E<br>2021                     | Multicenter<br>Retrospective<br>Nivolumab | All: 87<br>Female: 18 (20.7)                                                 | 11                                         | Male (REF <sup>d</sup> ) vs.<br>Female 1.01<br>(0.50-2.05)           | Male (REF) vs.<br>Female 0.85 (0.45-<br>1.60) | Male: n/a<br>Female: n/a        |            |

|                  |                    |                                                                   |                               |                               |                          |                          |                          |                                               |
|------------------|--------------------|-------------------------------------------------------------------|-------------------------------|-------------------------------|--------------------------|--------------------------|--------------------------|-----------------------------------------------|
| 31043824<br>[23] | Stukatin I<br>2019 | Multicenter<br>Retrospective<br>Cabozantinib vs.<br>Nivolumab     | All: 278<br>Female: 56 (20.1) | n/a                           | Male: n/a<br>Female: n/a | Male: n/a<br>Female: n/a | Male: n/a<br>Female: n/a | Same study as in<br>Table 1<br>(Cabozantinib) |
| 35373823<br>[42] | Ishihara I<br>2022 | Multicenter<br>Retrospective<br>Nivolumab                         | All: 74<br>Female: 16 (21.6)  | 25.8                          | Male: n/a<br>Female: n/a | Male: n/a<br>Female: n/a | Male: n/a<br>Female: n/a |                                               |
| 33159426<br>[43] | Ishihara I<br>2021 | Multicenter<br>Retrospective<br>Nivolumab vs.<br>Targeted Therapy | All: 159<br>Female: 46 (28.9) | 13.2<br>(Nivolumab<br>Cohort) | Male: n/a<br>Female: n/a | Male: n/a<br>Female: n/a | Male: n/a<br>Female: n/a |                                               |
| 32048159<br>[44] | Jose JFM<br>2020   | Multicenter<br>Retrospective<br>Nivolumab                         | All: 90<br>Female: 15 (16.7)  | 8.5                           | Male: n/a<br>Female: n/a | Male: n/a<br>Female: n/a | Male: n/a<br>Female: n/a |                                               |

a: HR: hazard ratio, b: CI: confidence interval, c: n/a: not available, d: REF: reference

Accepted Manuscript

Table 3

Table 3: Lenvatinib/Everolimus in metastatic renal cell cancer

| Trial<br>PMID                              | First Author<br>Year of<br>publication | Study Design<br>Study drug(s)                                      | Patient<br>numbers<br>All [n]<br>Female<br>[n;%] | Follow-Up<br>(median)<br>[months] | Overall<br>Survival                       | Progression-Free<br>Survival | Discontinuation<br>of<br>treatment | Annotation |
|--------------------------------------------|----------------------------------------|--------------------------------------------------------------------|--------------------------------------------------|-----------------------------------|-------------------------------------------|------------------------------|------------------------------------|------------|
|                                            |                                        |                                                                    |                                                  |                                   | HR <sup>a</sup> (95%<br>CI <sup>b</sup> ) | HR (95% CI)                  | Male<br>Female<br>[%]              |            |
| <i>Approval studies</i>                    |                                        |                                                                    |                                                  |                                   |                                           |                              |                                    |            |
| E7080-<br>G000-205<br><br>26482279<br>[45] | Motzer RJ<br>2015                      | Phase II<br>Lenvatinib vs. Everolimus vs.<br>Lenvatinib+Everolimus | All: 153<br>Female: 41<br>(26.8)                 | n/a <sup>c</sup>                  | Male: n/a<br><br>Female:<br>n/a           | Male: n/a<br><br>Female: n/a | Male: n/a<br><br>Female: n/a       |            |
| <i>Real world data</i>                     |                                        |                                                                    |                                                  |                                   |                                           |                              |                                    |            |
| 32291161<br>[46]                           | Hamieh L<br>2020                       | Monocenter<br>Retrospective<br>Lenvatinib + Everolimus             | All: 7<br>Female: 0<br>(0%)                      | n/a (range 4-<br>17)              | Male: n/a<br><br>Female:<br>n/a           | Male: n/a<br><br>Female: n/a | Male: n/a<br><br>Female: n/a       |            |
| 33792094<br>[47]                           | Wiele AJ<br>2021                       | Monocenter<br>Retrospective<br>Lenvatinib +/- Everolimus           | All: 55<br>Female: 16<br>(29.1)                  | n/a                               | Male: n/a<br><br>Female:<br>n/a           | Male: n/a<br><br>Female: n/a | Male: n/a<br><br>Female: n/a       |            |

a: HR: hazard ratio, b: CI: confidence interval, c: n/a: not available

Table 4

Table 4: Tivozanib in metastatic renal cell cancer

| Trial<br>PMID                   | First<br>Author<br><br>Year of<br>publication | Study Design<br><br>Study drug(s)         | Patient<br>numbers<br><br>All [n]<br>Female [n;%] | Follow-Up<br>(median)<br>[months] | Overall<br>Survival                    | Progression-Free<br>Survival                                       | Discontinuation<br>of<br>treatment | Annotation |
|---------------------------------|-----------------------------------------------|-------------------------------------------|---------------------------------------------------|-----------------------------------|----------------------------------------|--------------------------------------------------------------------|------------------------------------|------------|
|                                 |                                               |                                           |                                                   |                                   | HR <sup>a</sup> (95% CI <sup>b</sup> ) | HR (95% CI)                                                        | Male<br>Female<br>[%]              |            |
| <i>Approval studies</i>         |                                               |                                           |                                                   |                                   |                                        |                                                                    |                                    |            |
| TIVO-1<br>24019545<br>[48]      | Motzer RJ<br>2013                             | Phase III<br>Tivozanib vs.<br>Sorafenib   | All: 517<br>Female: 143<br>(27.7)                 | n/a <sup>c</sup>                  | Male: n/a<br>Female: n/a               | Male: n/a<br>Female: n/a                                           | Male: n/a<br>Female: n/a           |            |
| TIVO-3<br>31810797<br>[49]      | Rini BI<br>2020                               | Phase III<br>Tivozanib vs.<br>Sorafenib   | All: 350<br>Female: 96<br>(27.4)                  | 19                                | Male: n/a<br>Female: n/a               | <b>Male: 0.64 (0.47; 0.86)</b><br><b>Female: 0.72 (0.44; 1.18)</b> | Male: n/a<br>Female: n/a           |            |
| <i>Real world data</i>          |                                               |                                           |                                                   |                                   |                                        |                                                                    |                                    |            |
| Meet-Uro-16<br>34583356<br>[50] | Basso U<br>2021                               | Multicenter<br>Retrospective<br>Tivozanib | All: 64<br>Female: 24<br>(37.5)                   | 12.5                              | Male: n/a<br>Female: n/a               | Male: n/a<br>Female: n/a                                           | Male: n/a<br>Female: n/a           |            |
| 38478923<br>[51]                | Johns AC<br>2024                              | Unicenter<br>Retrospective<br>Tivozanib   | All: 30<br>Female: 7 (23.3)                       | 13.9                              | Male: n/a<br>Female: n/a               | Male: n/a<br>Female: n/a                                           | Male: n/a<br>Female: n/a           |            |

a: HR: hazard ratio, b: CI: confidence interval, c: n/a: not available

Table 5

Table 5: Axitinib/Pembrolizumab in metastatic renal cell cancer

| Trial<br>PMID                   | First Author<br>Year of publication | Study Design<br>Study drug(s)                                                         | Patient numbers<br>All [n]<br>Female [n;%] | Follow-Up (median) [months]                          | Overall Survival<br>HR <sup>a</sup> (95% CI <sup>b</sup> ) | Progression-Free Survival<br>HR (95% CI)                   | Discontinuation of treatment<br>Male<br>Female [%] | Annotation |
|---------------------------------|-------------------------------------|---------------------------------------------------------------------------------------|--------------------------------------------|------------------------------------------------------|------------------------------------------------------------|------------------------------------------------------------|----------------------------------------------------|------------|
| <i>Approval studies</i>         |                                     |                                                                                       |                                            |                                                      |                                                            |                                                            |                                                    |            |
| Keynote-426<br>30779529<br>[52] | Rini BI<br>2019                     | Phase III<br>Pembrolizumab +<br>Axitinib vs. Sunitinib                                | All: 861<br>Female:<br>233 (27.1)          | 12.8                                                 | Male: 0.54 (0.37;<br>0.80)<br>Female:<br>0.45 (0.25; 0.83) | Male: 0.77 (0.61;<br>0.97)<br>Female: 0.54<br>(0.37; 0.81) | Male: n/a <sup>c</sup><br>Female: n/a              |            |
| <i>Real world data</i>          |                                     |                                                                                       |                                            |                                                      |                                                            |                                                            |                                                    |            |
| 37992086<br>[53]                | Lai GS<br>2023                      | Multicenter<br>Retrospective<br>Pembrolizumab +<br>Axitinib vs. IO/IO vs.<br>TKI mono | All: 6297<br>Female:<br>1780 (28.3)        | Pembrolizumab+Axitinib<br>cohort only<br>16.7 (Mean) | Male: n/a<br>Female: n/a                                   | Male: n/a<br>Female: n/a                                   | Male: n/a<br>Female: n/a                           |            |
| 37722984<br>[54]                | Shah NJ<br>2023                     | Multicenter<br>Retrospective<br>Pembrolizumab +<br>Axitinib vs. IO/IO                 | All: 331<br>Female: 81<br>(24.5)           | Pembrolizumab+Axitinib<br>cohort only<br>10.1        | Male: n/a<br>Female: n/a                                   | Male: n/a<br>Female: n/a                                   | Male: n/a<br>Female: n/a                           |            |
| 37345413<br>[55]                | Harada KI<br>2023                   | Multicenter<br>Retrospective<br>Pembrolizumab +<br>Axitinib                           | All: 47<br>Female: 9<br>(19.1)             | 14                                                   | Male: n/a<br>Female: n/a                                   | Male: n/a<br>Female: n/a                                   | Male: n/a<br>Female: n/a                           |            |
| 36874600<br>[56]                | Shah NJ<br>2023                     | Multicenter<br>Retrospective<br>Pembrolizumab +<br>Axitinib vs. IO/IO vs.<br>TKI mono | All: 1538<br>Female:<br>462 (30.0)         | Pembrolizumab+Axitinib<br>cohort only<br>7.2         | Male: n/a<br>Female: n/a                                   | Male: n/a<br>Female: n/a                                   | Male: n/a<br>Female: n/a                           |            |
| 36200791<br>[57]                | Zarrabi KK<br>2023                  | Multicenter<br>Retrospective<br>Pembrolizumab +<br>Axitinib vs. IO/IO                 | All: 1506<br>Female:<br>403 (26.8)         | Entire cohort<br>20                                  | Male: n/a<br>Female: n/a                                   | Male: n/a<br>Female: n/a                                   | Male: n/a<br>Female: n/a                           |            |
| 35664758<br>[58]                | Zakharia Y<br>2022                  | Multicenter<br>Retrospective<br>Pembrolizumab +<br>Axitinib                           | All: 355<br>Female:<br>108 (30.4)          | 9.7                                                  | Male: n/a<br>Female: n/a                                   | Male: n/a<br>Female: n/a                                   | Male: n/a<br>Female: n/a                           |            |
| 35158357<br>[59]                | Hoeh B<br>2022                      | Multicenter<br>Retrospective<br>Pembrolizumab +<br>Axitinib vs. IO/IO                 | All: 104<br>Female: 34<br>(32.7)           | Pembrolizumab+Axitinib<br>cohort only:<br>9.2        | Male: n/a<br>Female: n/a                                   | Male: n/a<br>Female: n/a                                   | Male: n/a<br>Female: n/a                           |            |
| ProPAXI<br>39405768<br>[60]     | Guida A<br>2024                     | Multicenter<br>Prospective<br>Pembrolizumab +<br>Axitinib                             | All: 170<br>Female: 35<br>(20.6)           | 19.3                                                 | Male vs. Female<br>(REF) 0.77<br>(0.43;1.36)               | Male vs. Female<br>(REF) 0.76<br>(0.47;1.07)               | Male: n/a<br>Female: n/a                           |            |

a: HR: hazard ratio, b: CI: confidence interval, c: n/a: not available

Table 6

Table 6: Ipilimumab + Nivolumab in metastatic renal cell cancer

| Trial<br>PMID                     | First Author<br>Year of publication | Study Design<br>Study drug(s)                                                                                | Patient numbers<br>All [n]<br>Female [n;%]                               | Follow-Up (median)<br>[months]                          | Overall Survival<br>HR <sup>a</sup> (95% CI <sup>b</sup> )                              | Progression-Free Survival<br>HR (95% CI)                  | Discontinuation of treatment |                                                             | Annotation |
|-----------------------------------|-------------------------------------|--------------------------------------------------------------------------------------------------------------|--------------------------------------------------------------------------|---------------------------------------------------------|-----------------------------------------------------------------------------------------|-----------------------------------------------------------|------------------------------|-------------------------------------------------------------|------------|
|                                   |                                     |                                                                                                              |                                                                          |                                                         |                                                                                         |                                                           | Male                         | Female [%]                                                  |            |
| <i>Approval studies</i>           |                                     |                                                                                                              |                                                                          |                                                         |                                                                                         |                                                           |                              |                                                             |            |
| Checkmate-214<br>29562145<br>[61] | Motzer RJ<br>2018                   | Phase III<br>Ipilimumab +<br>Nivolumab vs.<br>Sunitinib                                                      | Intermediate/poor<br>IMDC <sup>d</sup><br>All: 847<br>Female: 232 (27.4) | 25.2                                                    | Intermediate/poor<br>IMDC<br>Male: 0.71 (0.55;<br>0.92)<br>Female: 0.52 (0.34;<br>0.78) | Male: n/a <sup>c</sup><br>Female: n/a                     | Male: n/a<br>Female: n/a     |                                                             |            |
| <i>Real world data</i>            |                                     |                                                                                                              |                                                                          |                                                         |                                                                                         |                                                           |                              |                                                             |            |
| 32893401<br>[62]                  | Tanaka T<br>2020                    | Multicenter<br>Retrospective<br>Ipilimumab +<br>Nivolumab                                                    | All: 52<br>Female: 11 (21.2)                                             | 16                                                      | Male: n/a<br>Female: n/a                                                                | Male: n/a<br>Female: n/a                                  | Male: n/a<br>Female: n/a     |                                                             |            |
| 34848474<br>[63]                  | Kato R<br>2021                      | Multicenter<br>Retrospective<br>Ipilimumab +<br>Nivolumab                                                    | All: 45<br>Female: 9 (20.0)                                              | 1-year-follow-up                                        | Male: n/a<br>Female: n/a                                                                | <b>Male (REF) vs.<br/>Female 5.546<br/>(2.092;14.704)</b> | Male: n/a<br>Female: n/a     |                                                             |            |
| 35024632<br>[64]                  | Meerveld-<br>Eggink<br>2022         | Multicenter<br>Retrospective<br>Ipilimumab +<br>Nivolumab                                                    | All: 71<br>Female: 14 (19.7)                                             | 11.5                                                    | Male: n/a<br>Female: n/a                                                                | Male: n/a<br>Female: n/a                                  | Male: n/a<br>Female: n/a     |                                                             |            |
| 38345708<br>[65]                  | Ishihara H<br>2024                  | Multicenter<br>Retrospective<br>Ipilimumab +<br>Nivolumab vs.<br>TKI <sup>e</sup> /IO <sup>f</sup>           | All: 175<br>Female: 47 (26.9)                                            | Entire cohort<br>15                                     | Male: n/a<br>Female: n/a                                                                | Male: n/a<br>Female: n/a                                  | Male: n/a<br>Female: n/a     |                                                             |            |
| 38251783<br>[66]                  | Ishihara H<br>2024                  | Multicenter<br>Retrospective<br>Ipilimumab +<br>Nivolumab                                                    | All: 56<br>Female: 16 (28.6)                                             | 34.4                                                    | Male vs. Female<br>(REF) 0.92 (0.38;<br>2.26)                                           | Male: n/a<br>Female: n/a                                  | Male: n/a<br>Female: n/a     |                                                             |            |
| 37992086<br>[53]                  | Lai GS<br>2023                      | Multicenter<br>Retrospective<br>Ipilimumab +<br>Nivolumab vs.<br>Axitinib +<br>Pembrolizumab vs.<br>TKI mono | All: 6297<br>Female: 1780<br>(28.3)                                      | Ipilimumab +<br>Nivolumab<br>cohort only<br>19.7 (Mean) | Male: n/a<br>Female: n/a                                                                | Male: n/a<br>Female: n/a                                  | Male: n/a<br>Female: n/a     | Same study as in<br>Table 5<br>(Pembrolizumab/<br>Axitinib) |            |
| 37722984<br>[54]                  | Shah NJ<br>2023                     | Multicenter<br>Retrospective<br>Ipilimumab +<br>Nivolumab vs.<br>Axitinib +<br>Pembrolizumab                 | All: 331<br>Female: 81 (24.5)                                            | Ipilimumab +<br>Nivolumab<br>cohort only<br>10.7        | Male: n/a<br>Female: n/a                                                                | Male: n/a<br>Female: n/a                                  | Male: n/a<br>Female: n/a     | Same study as in<br>Table 5<br>(Pembrolizumab/<br>Axitinib) |            |

|                  |                     |                                                                                                              |                                 |                                                 |                                                                                            |                                                                               |                              |                                                             |
|------------------|---------------------|--------------------------------------------------------------------------------------------------------------|---------------------------------|-------------------------------------------------|--------------------------------------------------------------------------------------------|-------------------------------------------------------------------------------|------------------------------|-------------------------------------------------------------|
| 36874600<br>[56] | Shah NJ<br>2023     | Multicenter<br>Retrospective<br>Ipilimumab +<br>Nivolumab vs.<br>Axitinib +<br>Pembrolizumab vs.<br>TKI Mono | All: 1538<br>Female: 462 (30.0) | Ipilimumab +<br>Nivolumab<br>cohort only<br>8.5 | Male: n/a<br><br>Female: n/a                                                               | Male: n/a<br><br>Female: n/a                                                  | Male: n/a<br><br>Female: n/a | Same study as in<br>Table 5<br>(Pembrolizumab/<br>Axitinib) |
| 36200791<br>[57] | Zarrabi KK<br>2023  | Multicenter<br>Retrospective<br>Ipilimumab +<br>Nivolumab vs.<br>Axitinib +<br>Pembrolizumab                 | All: 1506<br>Female: 403 (26.8) | Entire cohort:<br>20                            | Male: n/a<br><br>Female: n/a                                                               | Male: n/a<br><br>Female: n/a                                                  | Male: n/a<br><br>Female: n/a | Same study as in<br>Table 5<br>(Pembrolizumab/<br>Axitinib) |
| 35831538<br>[67] | Kato T<br>2022      | Multicenter<br>Retrospective<br>Ipilimumab +<br>Nivolumab                                                    | All: 72<br>Female: 11 (15.3)    | 16.1                                            | Synchronous M1 <sup>g</sup><br>disease:<br>Male (REF) vs.<br>Female 1.327<br>(0.305;4.098) | Synchronous M1<br>disease:<br>Male (REF) vs.<br>Female 0.764<br>(0.181;2.210) | Male: n/a<br><br>Female: n/a |                                                             |
| 35115252<br>[68] | Thana M<br>2022     | Multicenter<br>Retrospective<br>Ipilimumab +<br>Nivolumab                                                    | All: 195<br>Female: 49 (25.1)   | 10.6                                            | Male: n/a<br><br>Female: n/a                                                               | Male: n/a<br><br>Female: n/a                                                  | Male: n/a<br><br>Female: n/a |                                                             |
| 39727706<br>[69] | Taniguchi T<br>2024 | Multicenter<br>Retrospective<br>Ipilimumab +<br>Nivolumab                                                    | All: 84<br>Female: 18 (21.4)    | 18,3                                            | Male: n/a<br><br>Female: n/a                                                               | Male: n/a<br><br>Female: n/a                                                  | Male: n/a<br><br>Female: n/a |                                                             |

a: HR: hazard ratio, b: CI: confidence interval, c: n/a: not available, d: IMDC: International Metastatic Renal Cell Carcinoma Database Consortium, e: TKI: tyrosine kinase inhibitor, f: IO: immune-oncology therapy, g: M1: distant metastases

Table 7

Table 7: Nivolumab + Cabozantinib in metastatic renal cell cancer

| Trial<br>PMID                        | First<br>Author<br><br>Year of<br>publication | Study Design<br><br>Study drug(s)                        | Patient<br>numbers<br><br>All [n]<br>Female [n;%] | Follow-Up<br>(median)<br>[months] | Overall Survival                                                           | Progression-Free<br>Survival                               | Discontinuation<br>of<br>treatment                 | Annotation |
|--------------------------------------|-----------------------------------------------|----------------------------------------------------------|---------------------------------------------------|-----------------------------------|----------------------------------------------------------------------------|------------------------------------------------------------|----------------------------------------------------|------------|
|                                      |                                               |                                                          |                                                   |                                   | HR <sup>a</sup> (95% CI <sup>b</sup> )                                     | HR <sup>a</sup> (95% CI <sup>b</sup> )                     | Male<br>Female<br>[%]                              |            |
| <i>Approval studies</i>              |                                               |                                                          |                                                   |                                   |                                                                            |                                                            |                                                    |            |
| CheckMate<br>9ER<br>33657295<br>[70] | Choueiri TK<br>2021                           | Phase III<br>Nivolumab + Cabozantinib<br>vs. Sunitinib   | All: 651<br>Female: 170<br>(26.1)                 | 18,1                              | <b>Male: 0.59 (0.40;<br/>0.85)</b><br><b>Female: 0.68<br/>(0.39; 1.18)</b> | Male: 0.48 (0.37;<br>0.62)<br>Female: 0.61 (0.40;<br>0.94) | Male: n/a <sup>c</sup><br>Female: n/a <sup>c</sup> |            |
| <i>Real world data</i>               |                                               |                                                          |                                                   |                                   |                                                                            |                                                            |                                                    |            |
| 39272856<br>[71]                     | Hilser T<br>2024                              | Multicenter<br>Retrospective<br>Nivolumab + Cabozantinib | All: 96<br>Female: 32<br>(33.3)                   | 12.7                              | Male: n/a <sup>c</sup><br>Female: n/a <sup>c</sup>                         | Male: n/a <sup>c</sup><br>Female: n/a <sup>c</sup>         | Male: n/a <sup>c</sup><br>Female: n/a <sup>c</sup> |            |

a: HR: hazard ratio, b: CI: confidence interval, c: n/a: not available

Table 8

Table 8: Pembrolizumab + Lenvatinib in metastatic renal cell cancer

| Trial<br>PMID             | First<br>Author<br><br>Year of<br>publication | Study Design<br><br>Study drug(s)                                                       | Patient<br>numbers<br><br>All [n]<br>Female<br>[n;%]    | Follow-Up<br>(median)<br>[months] | Overall<br>Survival                                   | Progression-Free<br>Survival                                                                         | Discontinuation of<br>treatment                    | Annotation |
|---------------------------|-----------------------------------------------|-----------------------------------------------------------------------------------------|---------------------------------------------------------|-----------------------------------|-------------------------------------------------------|------------------------------------------------------------------------------------------------------|----------------------------------------------------|------------|
|                           |                                               |                                                                                         |                                                         |                                   | HR <sup>a</sup> (95%<br>CI <sup>b</sup> )             | HR <sup>a</sup> (95% CI <sup>b</sup> )                                                               | Male<br>Female<br>[%]                              |            |
| <i>Approval studies</i>   |                                               |                                                                                         |                                                         |                                   |                                                       |                                                                                                      |                                                    |            |
| CLEAR<br>33616314<br>[72] | Motzer RJ<br>2021                             | Phase III<br>Pembrolizumab + Lenvatinib vs.<br>Lenvatinib + Everolimus vs.<br>Sunitinib | Entire<br>cohort:<br>All: 1069<br>Female: 273<br>(25.5) | Entire<br>cohort:<br>26.6         | Male: n/a <sup>c</sup><br>Female:<br>n/a <sup>c</sup> | Pembrolizumab +<br>Lenvatinib vs. Sunitinib:<br>Male: 0.38 (0.30; 0.49)<br>Female: 0.42 (0.27; 0.66) | Male: n/a <sup>c</sup><br>Female: n/a <sup>c</sup> |            |
| <i>Real world data</i>    |                                               |                                                                                         |                                                         |                                   |                                                       |                                                                                                      |                                                    |            |
| 39472358<br>[73]          | Hara T<br>2024                                | Multicenter<br>Retrospective<br>Pembrolizumab + Lenvatinib                              | All: 50<br>Female: 9<br>(18.0)                          | n/a <sup>c</sup>                  | Male: n/a <sup>c</sup><br>Female:<br>n/a <sup>c</sup> | Male: n/a <sup>c</sup><br>Female: n/a <sup>c</sup>                                                   | Male: n/a <sup>c</sup><br>Female: n/a <sup>c</sup> |            |

a: HR: hazard ratio, b: CI: confidence interval, c: n/a: not available

Table 9

Table 9: Pembrolizumab adjuvant in renal cell cancer

| Trial<br>PMID                       | First<br>Author<br><br>Year of<br>publication | Study Design<br><br>Study drug(s)             | Patient<br>numbers<br><br>All [n]<br>Female [n;%] | Follow-Up<br>(median)<br>[months] | Overall<br>Survival                                | Progression-Free<br>Survival                                                                          | Discontinuation<br>of<br>treatment                 | Annotation                                      |
|-------------------------------------|-----------------------------------------------|-----------------------------------------------|---------------------------------------------------|-----------------------------------|----------------------------------------------------|-------------------------------------------------------------------------------------------------------|----------------------------------------------------|-------------------------------------------------|
|                                     |                                               |                                               |                                                   |                                   | HR <sup>a</sup> (95%<br>CI <sup>b</sup> )          | HR <sup>a</sup> (95% CI <sup>b</sup> )                                                                | Male<br>Female<br>[%]                              |                                                 |
| <i>Approval studies</i>             |                                               |                                               |                                                   |                                   |                                                    |                                                                                                       |                                                    |                                                 |
| Keynote-<br>564<br>34407342<br>[74] | Choueiri TK<br>2021                           | Phase III<br>Pembrolizumab vs.<br>Placebo     | All: 994<br>Female: 288<br>(29.0)                 | 24.1                              | Male: n/a <sup>c</sup><br>Female: n/a <sup>c</sup> | <b>DFS<sup>d</sup>:</b><br><b>Male: 0.66 (0.49;<br/>0.89)</b><br><b>Female: 0.75 (0.48;<br/>1.16)</b> | Male: n/a <sup>c</sup><br>Female: n/a <sup>c</sup> | DFS <sup>d</sup> instead of<br>PFS <sup>e</sup> |
| <i>Real world data</i>              |                                               |                                               |                                                   |                                   |                                                    |                                                                                                       |                                                    |                                                 |
| 39719131<br>[75]                    | Mattigk A<br>2024                             | Multicenter<br>Retrospective<br>Pembrolizumab | All: 51<br>Female: 18<br>(35.3)                   | 6                                 | Male: n/a <sup>c</sup><br>Female: n/a <sup>c</sup> | Male: n/a <sup>c</sup><br>Female: n/a <sup>c</sup>                                                    | Male: n/a <sup>c</sup><br>Female: n/a <sup>c</sup> |                                                 |

a: HR: hazard ratio, b: CI: confidence interval, c: n/a: not available, d: DFS: disease-free survival, e: PFS: progression-free survival

Table 10

Table 10: Search Strings

cabozantinib AND (CABOSUN)  
cabozantinib AND (CABOSUN) AND (real world)  
cabozantinib AND ((kidney cancer) OR (renal cancer) OR (renal carcinoma) OR (renal cell cancer) OR (renal cell carcinoma)) AND (first line) AND (real world)

cabozantinib AND (METEOR)  
cabozantinib AND (METEOR) AND (real world)  
cabozantinib AND ((kidney cancer) OR (renal cancer) OR (renal carcinoma) OR (renal cell cancer) OR (renal cell carcinoma)) AND (second line) AND (real world)

nivolumab AND (checkmate-025)  
nivolumab AND ((checkmate-025) OR (CA209-025)) AND (real world)  
nivolumab AND ((kidney cancer) OR (renal cancer) OR (renal carcinoma) OR (renal cell cancer) OR (renal cell carcinoma)) AND (second line) AND (real world)

lenvatinib AND everolimus AND motzer [first author]  
lenvatinib AND everolimus AND (E7080-G000-205) AND (real world)  
(lenvatinib plus everolimus) AND ((kidney cancer) OR (renal cancer) OR (renal carcinoma) OR (renal cell cancer) OR (renal cell carcinoma)) AND (real world)

tivozanib AND motzer [first author]  
tivozanib AND (tivo-3)  
(tivozanib) AND ((kidney cancer) OR (renal cancer) OR (renal carcinoma) OR (renal cell cancer) OR (renal cell carcinoma)) AND (real world)  
(tivozanib [title]) AND ((kidney cancer) OR (renal cancer) OR (renal carcinoma) OR (renal cell cancer) OR (renal cell carcinoma))

axitinib AND pembrolizumab AND (keynote 426)  
axitinib AND pembrolizumab AND (keynote 426) AND (real world)  
(axitinib AND pembrolizumab) AND ((kidney cancer) OR (renal cancer) OR (renal carcinoma) OR (renal cell cancer) OR (renal cell carcinoma)) AND (real world)

nivolumab AND ipilimumab AND checkmate-214  
nivolumab AND ipilimumab AND checkmate-214 AND (real world)

nivolumab AND cabozantinib AND (checkmate 9ER)  
nivolumab AND cabozantinib AND (checkmate 9ER) AND (real world)  
(cabozantinib AND nivolumab) AND ((kidney cancer) OR (renal cancer) OR (renal carcinoma) OR (renal cell cancer) OR (renal cell carcinoma)) AND (real world)

lenvatinib AND pembrolizumab AND (CLEAR)  
lenvatinib AND pembrolizumab AND (CLEAR) AND (real world)  
(lenvatinib AND pembrolizumab) AND ((kidney cancer) OR (renal cancer) OR (renal carcinoma) OR (renal cell cancer) OR (renal cell carcinoma)) AND (real world)  
(lenvatinib AND pembrolizumab [title]) AND ((kidney cancer) OR (renal cancer) OR (renal carcinoma) OR (renal cell cancer) OR (renal cell carcinoma))

pembrolizumab AND (keynote 564)  
pembrolizumab AND (keynote 564) AND (real world)  
(adjuvant AND pembrolizumab [title]) AND ((kidney cancer) OR (renal cancer) OR (renal carcinoma) OR (renal cell cancer) OR (renal cell carcinoma))
